# Supplementary material for: Reconstruction of Par-dependent polarity in apolar cells reveals a dynamic process of cortical polarization
Source: PubMed Central journal article supplement (PMC6555595; doi:10.7554/elife.45559), 2019-06-07
Supplement: elife-45559-fig3-data2.pdf [file elife-45559-fig3-data2.pdf]

# UAS-Par3

(exp.1)

pDA-Par3

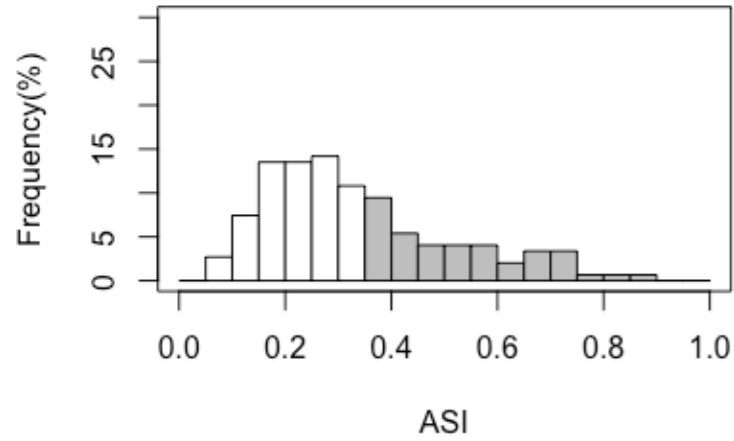

n=148

mean = 0.34, sd = 0.18

(ASI>0.35 mean = 0.52, sd = 0.14)

(exp.2)

pDA-Par3

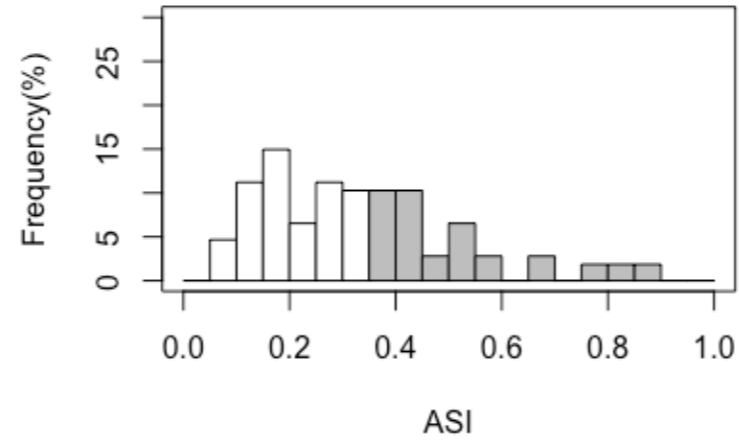

n=107

mean = 0.33, sd = 0.19

(ASI>0.35 mean = 0.52, sd = 0.15)

(exp.1 + exp.2)

pDA-Par3

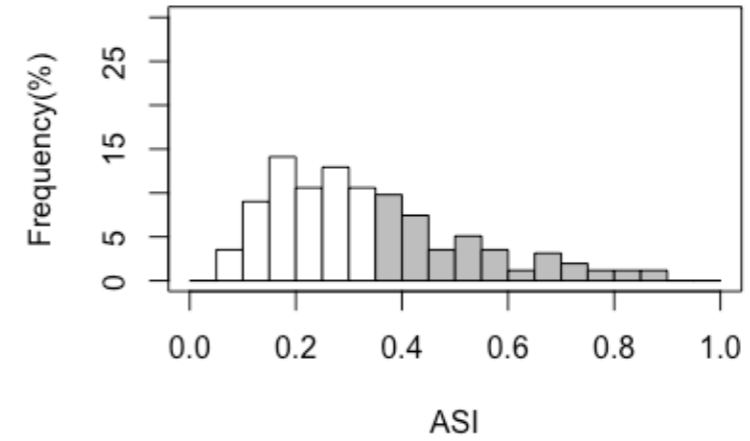

n=255

mean = 0.34, sd = 0.18

(ASI>0.35 mean = 0.52, sd = 0.14)

# UAS-Membrane

(exp.1)

membrane

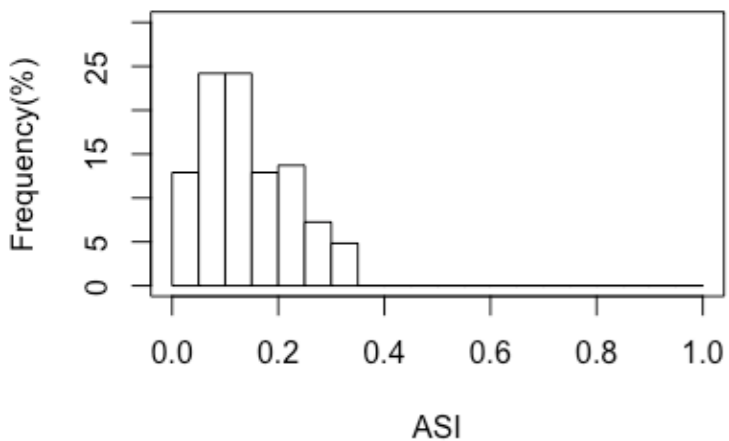

n=124

mean = 0.14, sd = 0.08

(exp.2)

membrane

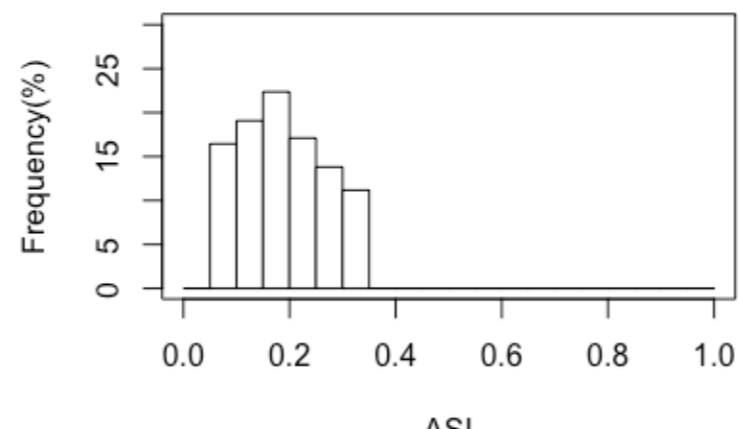

n=152

mean = 0.19, sd = 0.08

(exp.1 + exp.2)

membrane

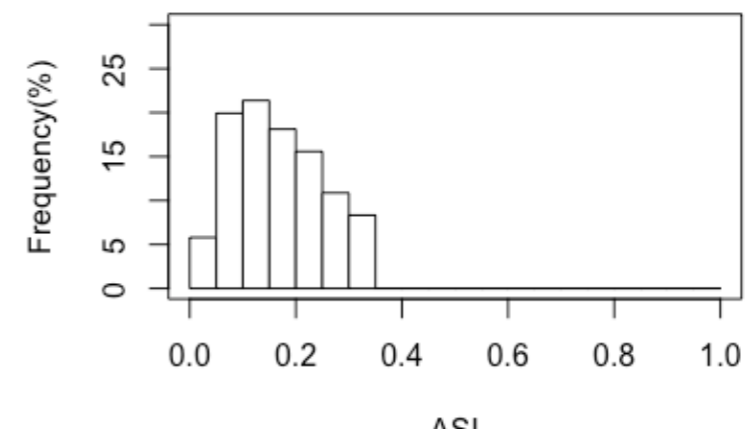

n=276

mean = 0.17, sd = 0.08

UAS-Par3 vs. UAS-membrane

ks.test <  $2.2 \times 10^{-16}$

Wilcox.test <  $x10^{-16}$
