# Supplementary material for: Reconstruction of Par-dependent polarity in apolar cells reveals a dynamic process of cortical polarization
Source: PubMed Central journal article supplement (PMC6555595; doi:10.7554/elife.45559), 2019-06-07

Figure12-figure supplement 2A

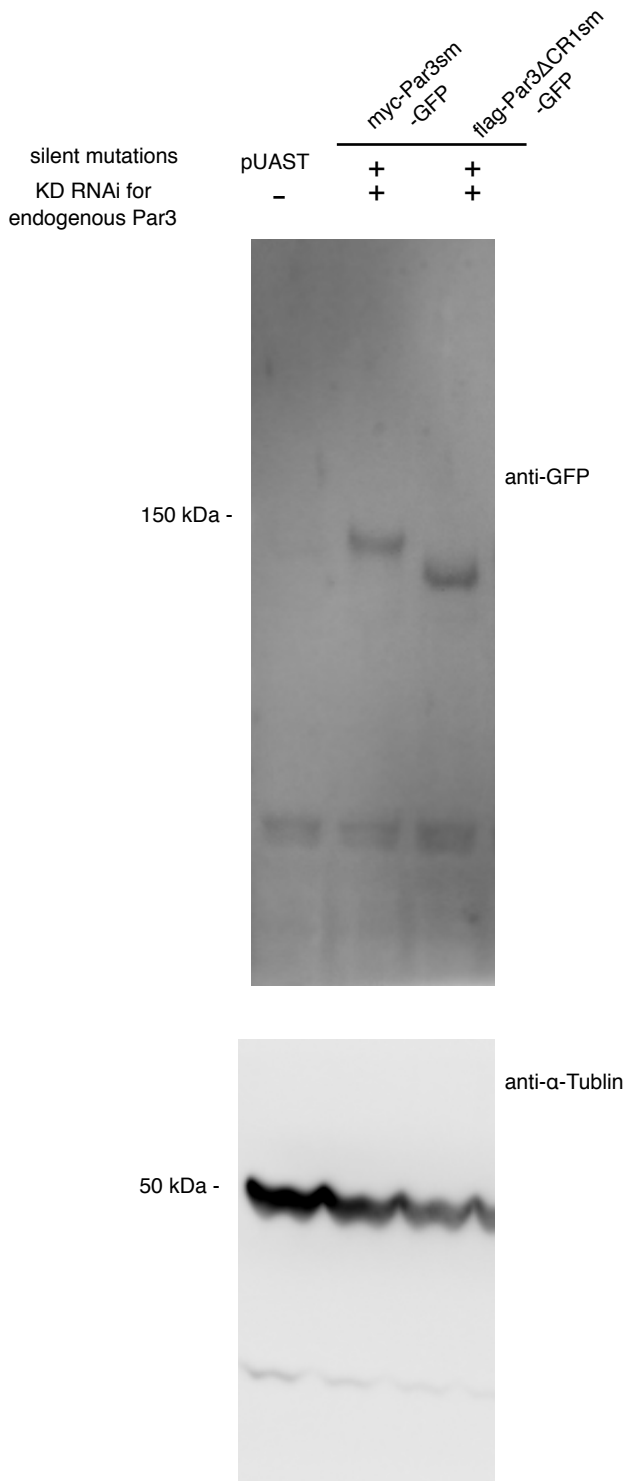

Figure12-figure supplement 2B

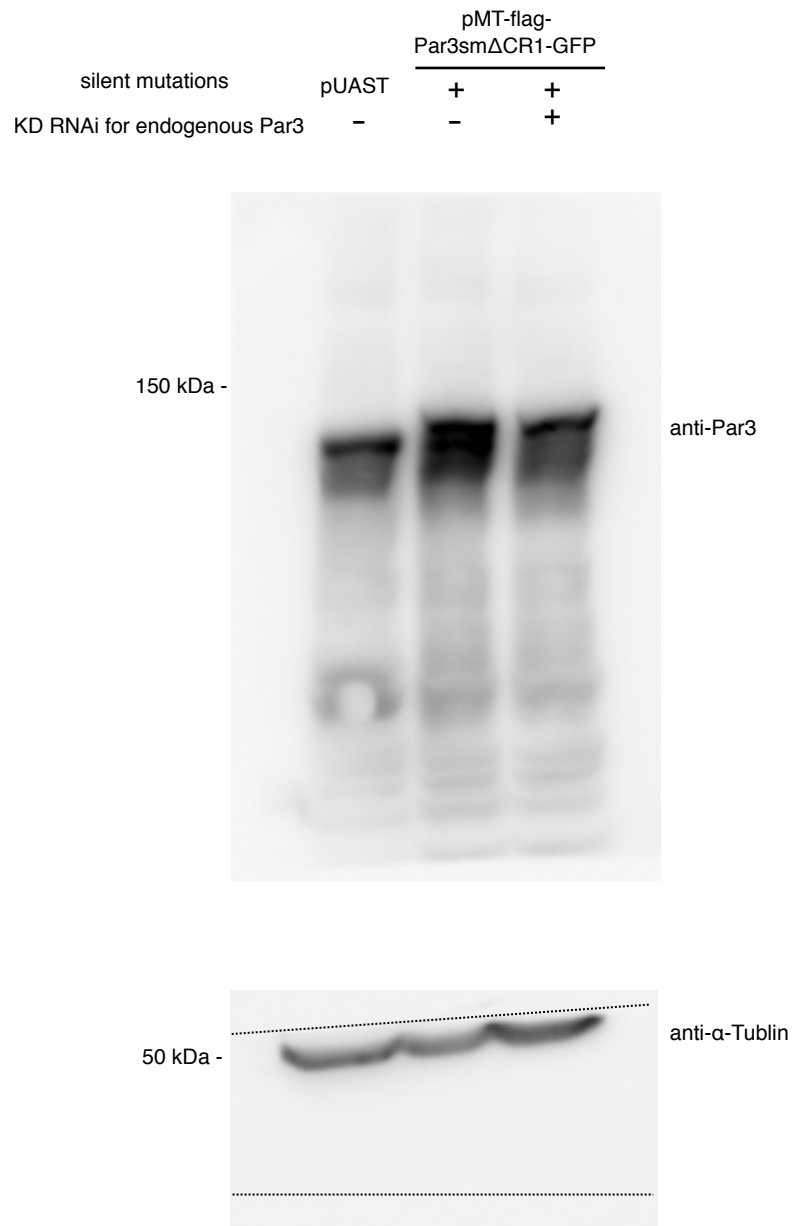

Figure12-figure supplement 2C

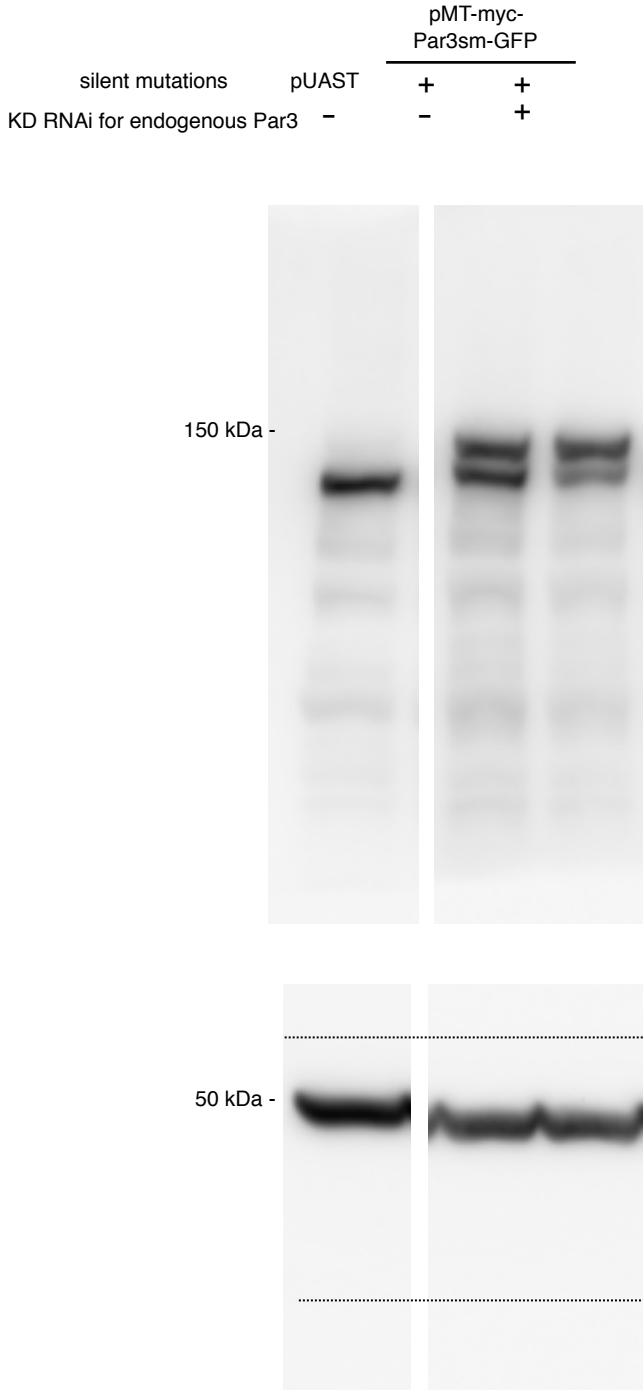

Figure12-figure supplement 2D

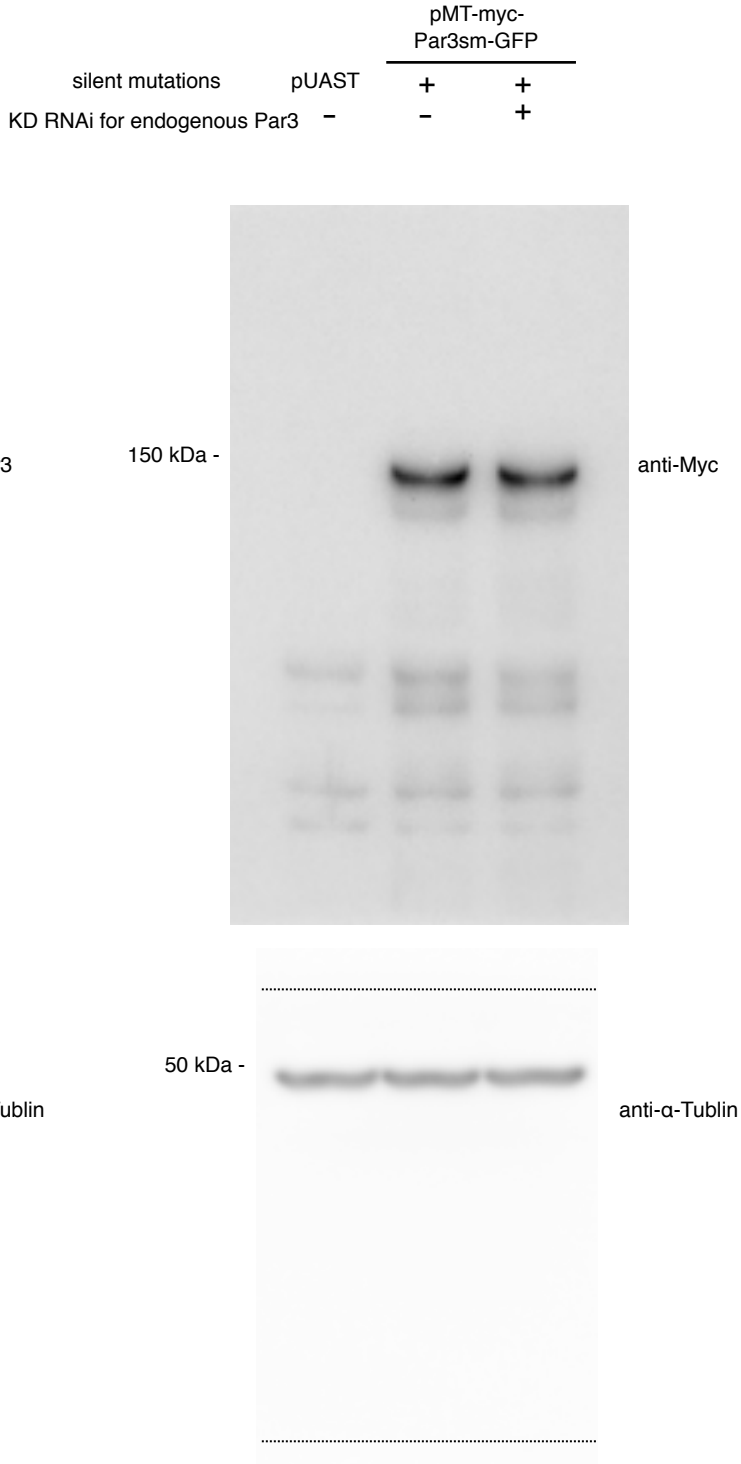

Supplement: elife-45559-fig12-figsupp2-data1.pdf [file elife-45559-fig12-figsupp2-data1.pdf]
